# Supplementary material for: Mn2(CO)10 and UV light: a promising combination for regioselective alkene hydrosilylation at low temperature
Source: Royal Society of Chemistry journal article supplement (doi:10.1039/d2cc00377e), 2022-01-01

Supporting information

# Mn<sub>2</sub>(CO)<sub>10</sub> and UV light: a promising combination for regioselective alkene hydrosilylation at low temperature

*Anthony Vivien,<sup>a</sup> Laurent Veyre,<sup>a</sup> Raphaël Mirgalet,<sup>b</sup> Clément Camp,<sup>a</sup> Chloé Thieuleux<sup>\*a</sup>*

a. Université de Lyon, Institut de Chimie de Lyon, Laboratory of Catalysis, Polymerization, Processes and Materials, CP2M UMR 5128 CNRS-UCB Lyon 1-CPE Lyon, CPE Lyon 43 Bd du 11 Novembre 1918, 69616 Villeurbanne, France.

b. Elkem Silicones, R&I Chemistry, 9 rue Specia, 69190 Saint Fons, France.

## Table of contents

|                                                 |   |
|-------------------------------------------------|---|
| Equipment and methods .....                     | 2 |
| Experimental procedures and spectral data ..... | 2 |
| NMR spectra .....                               | 7 |

## **Equipment and methods**

Unless otherwise noted, all reactions were conducted in oven-dried vials with a magnetic stirring bar under an argon atmosphere. Toluene and mesitylene were distilled from sodium benzophenone ketyl radical and stored under argon in a glovebox.  $\text{Mn}_2(\text{CO})_{10}$  was used as received and stored under argon in a glovebox. Alkenes were stirred overnight on activated alumina, degassed by freeze-pump-thaw cycles, and stored under argon in a glovebox. Short-plug column chromatography was performed with Macherey-Nagel Silica 60 M silica gel (0.04–0.063 mm).

For all of the UV experiments, Asahi spectra xenon light source 300 W (Max303) instrument was used without any filters unless stated otherwise. The wavelength of the light was ca. 250–420 nm, and the reaction mixture could warm up to 45 °C maximum during the irradiation. At the end of the thermal or UV reaction, the mixture was passed through a short plug of silica (pentane was used as eluent) to remove the catalyst, and volatiles (remaining starting materials) were removed under reduced pressure to give a clear liquid product.

$^1\text{H}$  NMR spectra were recorded on a Bruker AC 300 MHz instrument. Chemical shifts ( $\delta$ ) are given in parts per million (ppm) referenced to the appropriate solvent peak ( $^1\text{H}$  NMR:  $\text{CDCl}_3$  at 7.26 ppm). The data are reported as follows: chemical shift (ppm), multiplicity (s = singlet, t = triplet, dd = doublet of doublets, nfm = non-first order multiplet, br. s = broad singlet, m = multiplet), coupling constant  $J$  (Hz), and integration.

Gas chromatography analysis was performed on an Agilent 8890 chromatograph with an HP5 (5% of phenylmethylsiloxane) column (30 m length, 320  $\mu\text{m}$  of diameter, 0.25 nm of thickness) equipped with a flame ionization detector (FID). Throughout the study, mesitylene was used as GC internal standard to obtain the GC yield for products **3a-i**.

## **Experimental procedures and spectral data**

### **General procedure for alkene hydrosilylations**

In an argon-filled glovebox, a 4 mL vial was charged with the appropriate alkene (0.47 mmol, 1 equiv.),  $\text{MD}^{\text{H}}\text{M}$  (256  $\mu\text{L}$ , 0.94 mmol, 2 equiv.), mesitylene (46  $\mu\text{L}$ , 0.335 mmol, GC standard),  $\text{Mn}_2(\text{CO})_{10}$  catalyst solution (47 mM, 100  $\mu\text{L}$ , 4.7  $\mu\text{mol}$ , 1 mol%), and a stirring bar. The reaction volume was adjusted by adding the corresponding amount of toluene to reach a total volume of 571  $\mu\text{L}$ . The vials were placed against the collimator and wrapped with aluminum foil for the reaction duration then quenched with a mixture of water and pentane (1:2) and filtrated through a pad of  $\text{MgSO}_4$  and silica. The catalytic reactions were monitored by GC using mesitylene as internal standard.

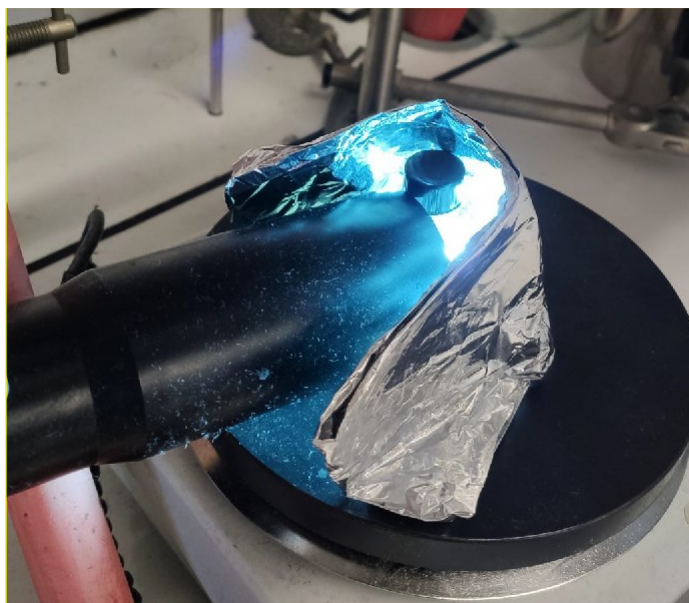

Experimental setup for alkene hydrosilylation under UV light

### General Procedure for 1-octene hydrosilylation with various silanes

In an argon-filled glovebox, a 4 mL vial was charged with 1-octene (74  $\mu\text{L}$ , 0.47 mmol, 1 equiv.), the chosen silane (0.94 mmol, 2 equiv.), mesitylene (46  $\mu\text{L}$ , 0.335 mmol, GC standard),  $\text{Mn}_2(\text{CO})_{10}$  catalyst solution (47 mM, 100  $\mu\text{L}$ , 4.7  $\mu\text{mol}$ , 1 mol%), and a stirring bar. The reaction volume was adjusted by adding the corresponding amount of toluene to reach a total volume of 571  $\mu\text{L}$ . The vials were placed against the collimator and wrapped with aluminum foil for the reaction duration then quenched with a mixture of water and pentane (1:2) and filtrated through a pad of  $\text{MgSO}_4$  and silica. The catalytic reactions were monitored by GC using mesitylene as internal standard.

**Table S1. Mn-catalyzed hydrosilylation of 1-octene with different silanes**

| Silanes                    | Yield after 4 hours    | Yield after 16 hours    |
|----------------------------|------------------------|-------------------------|
| $(\text{EtO})_3\text{SiH}$ | 9% (4% isomerization)  | 20% (15% isomerization) |
| $\text{Et}_3\text{SiH}$    | 32% (9% isomerization) | 46% (10% isomerization) |
| $\text{PhSiH}_3$           | 0%                     | < 1%                    |

### GC method used for the catalytic tests

For GC analysis, an Agilent 8890 chromatograph with a HP5 (5% of phenylmethylsiloxane) column was used (30 m length, 320  $\mu\text{m}$  of diameter, 0.25 nm of thickness, and 1.08 nm of deadtime) throughout the project for the characterization of alkene hydrosilylation tests. Initial oven temperature 70  $^\circ\text{C}$  (hold 1 min) and then two ramps were applied: first ramp - 10  $^\circ\text{C}/\text{min}$ , next temperature 120  $^\circ\text{C}$ , second ramp - 10  $^\circ\text{C}/\text{min}$ , next temperature 300  $^\circ\text{C}$  (hold 3 min). The flame ionization detector (FID) was set at 300  $^\circ\text{C}$ , with a  $\text{H}_2$  flow of 40 mL/min, air flow of 450 mL/min and a makeup flow of  $\text{N}_2$  of 450 mL/min. The calibration was made with 1-octene,

MD<sup>H</sup>M, 1,1,1,3,5,5,5-heptamethyl-3-octyltrisiloxane (previously synthesized in the lab) and compared with mesitylene, which was used as GC internal standard to obtain the response factors of all the reagents in the reaction medium.

### Radical trapping experiment

In an argon-filled glovebox, a 4 mL vial was charged with *n*-octene (0.47 mmol, 1 equiv.), MD<sup>H</sup>M (256  $\mu$ L, 0.94 mmol, 2 equiv.), (2,2,6,6-tetramethylpiperidin-1-yl)oxyl (5.9 mg, 0.038 mmol, 16 equiv./Mn), mesitylene (46  $\mu$ L, 0.335 mmol, GC standard), Mn<sub>2</sub>(CO)<sub>10</sub> catalyst solution (47 mM, 100  $\mu$ L, 4.7  $\mu$ mol, 1 mol%), 95  $\mu$ L of toluene and a stirring bar. The vial was placed against the collimator and wrapped with aluminum foil for the reaction duration then quenched with a mixture of water and pentane (1:2) and filtrated through a pad of MgSO<sub>4</sub> and silica. The catalytic reactions were monitored by GC using mesitylene as internal standard.

### Mercury test

In an argon-filled glovebox, a 4 mL vial was charged with *n*-octene (0.47 mmol, 1 equiv.), MD<sup>H</sup>M (256  $\mu$ L, 0.94 mmol, 2 equiv.), Hg (14  $\mu$ L, 0.94 mmol, 400 equiv./Mn), mesitylene (46  $\mu$ L, 0.335 mmol, GC standard), the toluene solution of Mn<sub>2</sub>(CO)<sub>10</sub> (47 mM, 100  $\mu$ L, 4.7  $\mu$ mol, 1 mol%), 81  $\mu$ L of toluene and a stirring bar. The vial was placed against the collimator and wrapped with aluminum foil for the reaction duration then quenched with a mixture of water and pentane (1:2) and filtrated through a pad of MgSO<sub>4</sub> and silica. The catalytic reactions were monitored by GC using mesitylene as internal standard.

### Isolation and characterization of the hydrosilylated products

After the designated reaction time, the crude mixtures (color variation from pale orange-brown to almost colorless) were passed through a neutral silica column (3 cm in height in a Pasteur pipette) and eluted with pentane. The collected solution was put under vacuum to remove the solvent. Resulting products were colorless or slightly yellow liquids.

### 1,1,1,3,5,5,5-heptamethyl-3-octyltrisiloxane (3a)

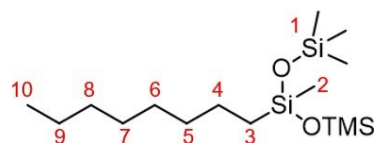

$^1\text{H}$  NMR (300 MHz,  $\text{CDCl}_3$ ):  $\delta$  = 1.34-1.24 (br. s, 12H,  $H_4$ - $H_9$ ), 0.88 (br. s, 3H,  $H_1$ ), 0.48-0.42 (br. s, 2H,  $H_3$ ), 0.09 (s, 18H,  $H_1$ ), -0.01 (s, 3H,  $H_2$ ). The spectroscopic data correspond to the reported data.<sup>1</sup>

### 1,1,1,3,5,5,5-heptamethyl-3-hexyltrisiloxane (3b)

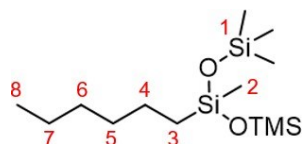

$^1\text{H}$  NMR (300 MHz,  $\text{CDCl}_3$ ):  $\delta$  = 1.29 (br. s, 8H,  $H_4$ - $H_7$ ), 0.89 (br. s, 3H,  $H_8$ ), 0.45 (br. s, 2H,  $H_3$ ), 0.09 (s, 18H,  $H_1$ ), 0.00 (s, 3H,  $H_2$ ). The spectroscopic data correspond to the reported data.<sup>1</sup>

### 1,1,1,3,5,5,5-heptamethyl-3-phenethyltrisiloxane (3c)

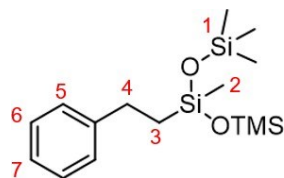

$^1\text{H}$  NMR (300 MHz,  $\text{CDCl}_3$ ):  $\delta$  = 7.31-7.25 (m, 2H,  $H_6$ ), 7.19-7.13 (m, 3H,  $H_5$ + $H_7$ ), 2.67-2.61 (m, 2H,  $H_4$ ), 0.88-0.80 (m, 2H,  $H_3$ ), 0.11 (s, 18H,  $H_1$ ), 0.03 (s, 3H,  $H_2$ ). The spectroscopic data correspond to the reported data.<sup>2</sup>

### 1,1,1,3,5,5,5-heptamethyl-3-(4-phenylbutyl)trisiloxane (3d)

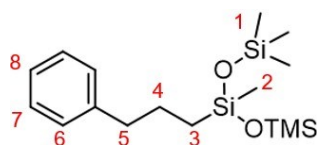

<sup>1</sup> X. Jia, Z. Huang, *Nature Chemistry* **2015**, 8, 157.

<sup>2</sup> A. Bokka, J. Jeon, *Organic Letters* **2016**, 18, 5324.

$^1\text{H}$  NMR (300 MHz,  $\text{CDCl}_3$ ):  $\delta$  = 7.29-7.23 (m, 2H,  $H_7$ ), 7.20-7.14 (m, 3H,  $H_6+H_8$ ), 2.62 (t,  $J$  = 7.7 Hz, 2H,  $H_5$ ), 1.67-1.59 (m, 2H,  $H_4$ ), 0.55-0.49 (m, 2H,  $H_3$ ), 0.08 (s, 18H,  $H_1$ ), 0.00 (s, 3H,  $H_2$ ). The spectroscopic data correspond to the reported data.<sup>3</sup>

#### 1,1,1,3,5,5,5-heptamethyl-3-(4-phenylbutyl)trisiloxane (3e)

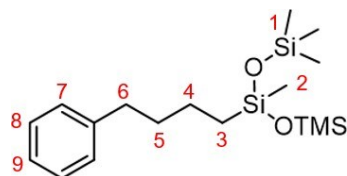

$^1\text{H}$  NMR (300 MHz,  $\text{CDCl}_3$ ):  $\delta$  = 7.29-7.20 (m, 2H,  $H_8$ ), 7.22-7.15 (m, 3H,  $H_6+H_8$ ), 2.61 (t,  $J$  = 7.7 Hz, 2H,  $H_5$ ), 1.65-1.60 (m, 2H,  $H_5$ ), 1.41-1.35 (m, 2H,  $H_4$ ), 0.53-0.46 (m, 2H,  $H_3$ ), 0.08 (s, 18H,  $H_1$ ), -0.01 (s, 3H,  $H_2$ ). The spectroscopic data correspond to the reported data.<sup>4</sup>

#### 1,1,1,3,5,5,5-heptamethyl-3-(3-(benzyloxy)propyl)trisiloxane (3f)

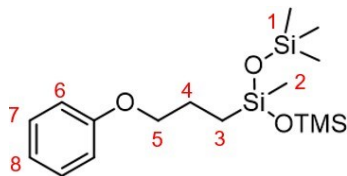

$^1\text{H}$  NMR (300 MHz,  $\text{CDCl}_3$ ):  $\delta$  = 7.29-7.22 (m, 2H,  $H_7$ ), 6.95-6.89 (m, 3H,  $H_6+H_8$ ), 3.91 (t, 2H,  $H_5$ ), 1.85-1.79 (m, 2H,  $H_4$ ), 0.61-0.55 (m, 2H,  $H_3$ ), 0.14 (s, 18H,  $H_1$ ), 0.04 (s, 3H,  $H_2$ ). The spectroscopic data correspond to the reported data.<sup>5</sup>

#### 1,1,1,3,5,5,5-heptamethyl-3-(3-Butoxypropyl)trisiloxane (3g)

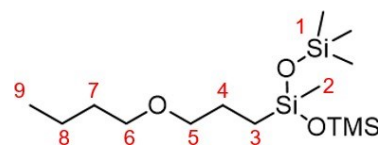

$^1\text{H}$  NMR (300 MHz,  $\text{CDCl}_3$ ):  $\delta$  = 3.42-3.36 (m, 4H,  $H_5+H_6$ ), 1.59-1.51 (m, 4H,  $H_4+H_7$ ), 1.41-1.35 (m, 2H,  $H_8$ ), 0.92 (t,  $J$  = 7.0 Hz, 3H,  $H_8$ ), 0.47-0.41 (m, 2H,  $H_3$ ), 0.08 (s, 18H,  $H_1$ ), 0.01 (s, 3H,  $H_2$ ). The spectroscopic data correspond to the reported data.<sup>6</sup>

<sup>3</sup> Imura, T.; Akasaka, N.; Kosai, T.; Iwamoto, T. *Dalton Trans.* **2017**, 46, 8868.

<sup>4</sup> R. Srivastava, M. Jakooobi, C. Thieuleux, E. A. Quadrelli, C. Camp, *Dalton Trans.*, **2021**, 50, 869.

<sup>5</sup> M. Jakooobi, V. Dardun, L. Veyre, V. Meille, C. Camp, C. Thieuleux, *J. Org. Chem.* **2020**, 85, 11732.

<sup>6</sup> H. Maciejewski, K. Szubert, B. Marciniec, J. Pernak, *Green Chem.*, **2009**, 11, 1045.

### 1,1,1,3,5,5,5-heptamethyl-3-(3-(trimethylsilyloxy)propyl)trisiloxane (3h)

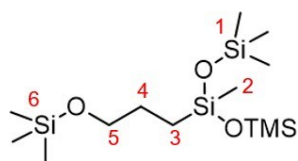

$^1\text{H}$  NMR (300 MHz,  $\text{CDCl}_3$ ):  $\delta$  = 3.51 (dd, 2H,  $H_5$ ), 1.58-1.52 (m, 2H,  $H_4$ ), 0.46-0.40 (m, 2H,  $H_3$ ), 0.11 (s, 9H,  $H_6$ ), 0.09 (s, 18H,  $H_1$ ), 0.01 (s, 3H,  $H_2$ ). The spectroscopic data correspond to the reported data.<sup>5</sup>

### 1,1,1,3,5,5,5-heptamethyl-3-(3-acetoxypentyl)trisiloxane (3i)

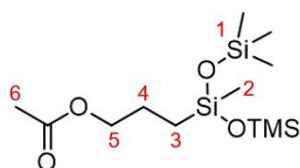

$^1\text{H}$  NMR (300 MHz,  $\text{CDCl}_3$ ):  $\delta$  = 3.91 (t, 2H,  $H_5$ ), 1.96 (s, 3H,  $H_6$ ), 1.59–1.49 (m, 2H,  $H_4$ ), 0.40–0.35 (m, 2H,  $H_3$ ), 0.00 (s, 18H,  $H_1$ ), -0.07 (s, 3H,  $H_2$ ). The spectroscopic data correspond to the reported data.<sup>5</sup>

### Triethoxy(octyl)silane (4)

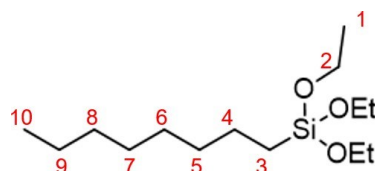

$^1\text{H}$  NMR (300 MHz,  $\text{CDCl}_3$ ):  $\delta$  = 3.83 (m, 2H,  $H_2$ ), 1.29–1.20 (m, 21H,  $H_1+H_3-H_8$ ), 0.87 (m, 3H,  $H_{10}$ ), 0.63 (s, 2H,  $H_9$ ). The spectroscopic data correspond to the reported data.<sup>7</sup>

### Triethyloctylsilane (5)

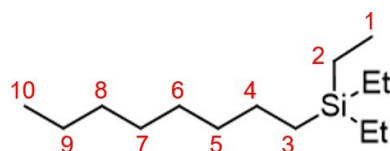

$^1\text{H}$  NMR (300 MHz,  $\text{CDCl}_3$ ):  $\delta$  = 1.26 (brs, 12H,  $H_3-H_8$ ), 0.91 (m, 12H,  $H_1+H_{10}$ ), 0.63 (m, 8H,  $H_2+H_9$ ). The spectroscopic data correspond to the reported data.<sup>7</sup>

<sup>7</sup> A. M. Tondreau, C. C. H. Atienza, K. J. Weller, S. A. Nye, K. M. Lewis, J. G. P. Delis, P. J. Chirik, *Science*, 2012, **335**, 567.

## NMR spectra

$^1\text{H}$  NMR spectrum (300 MHz,  $\text{CDCl}_3$ ) of functionalization of MD<sup>H</sup>M with 1-octene

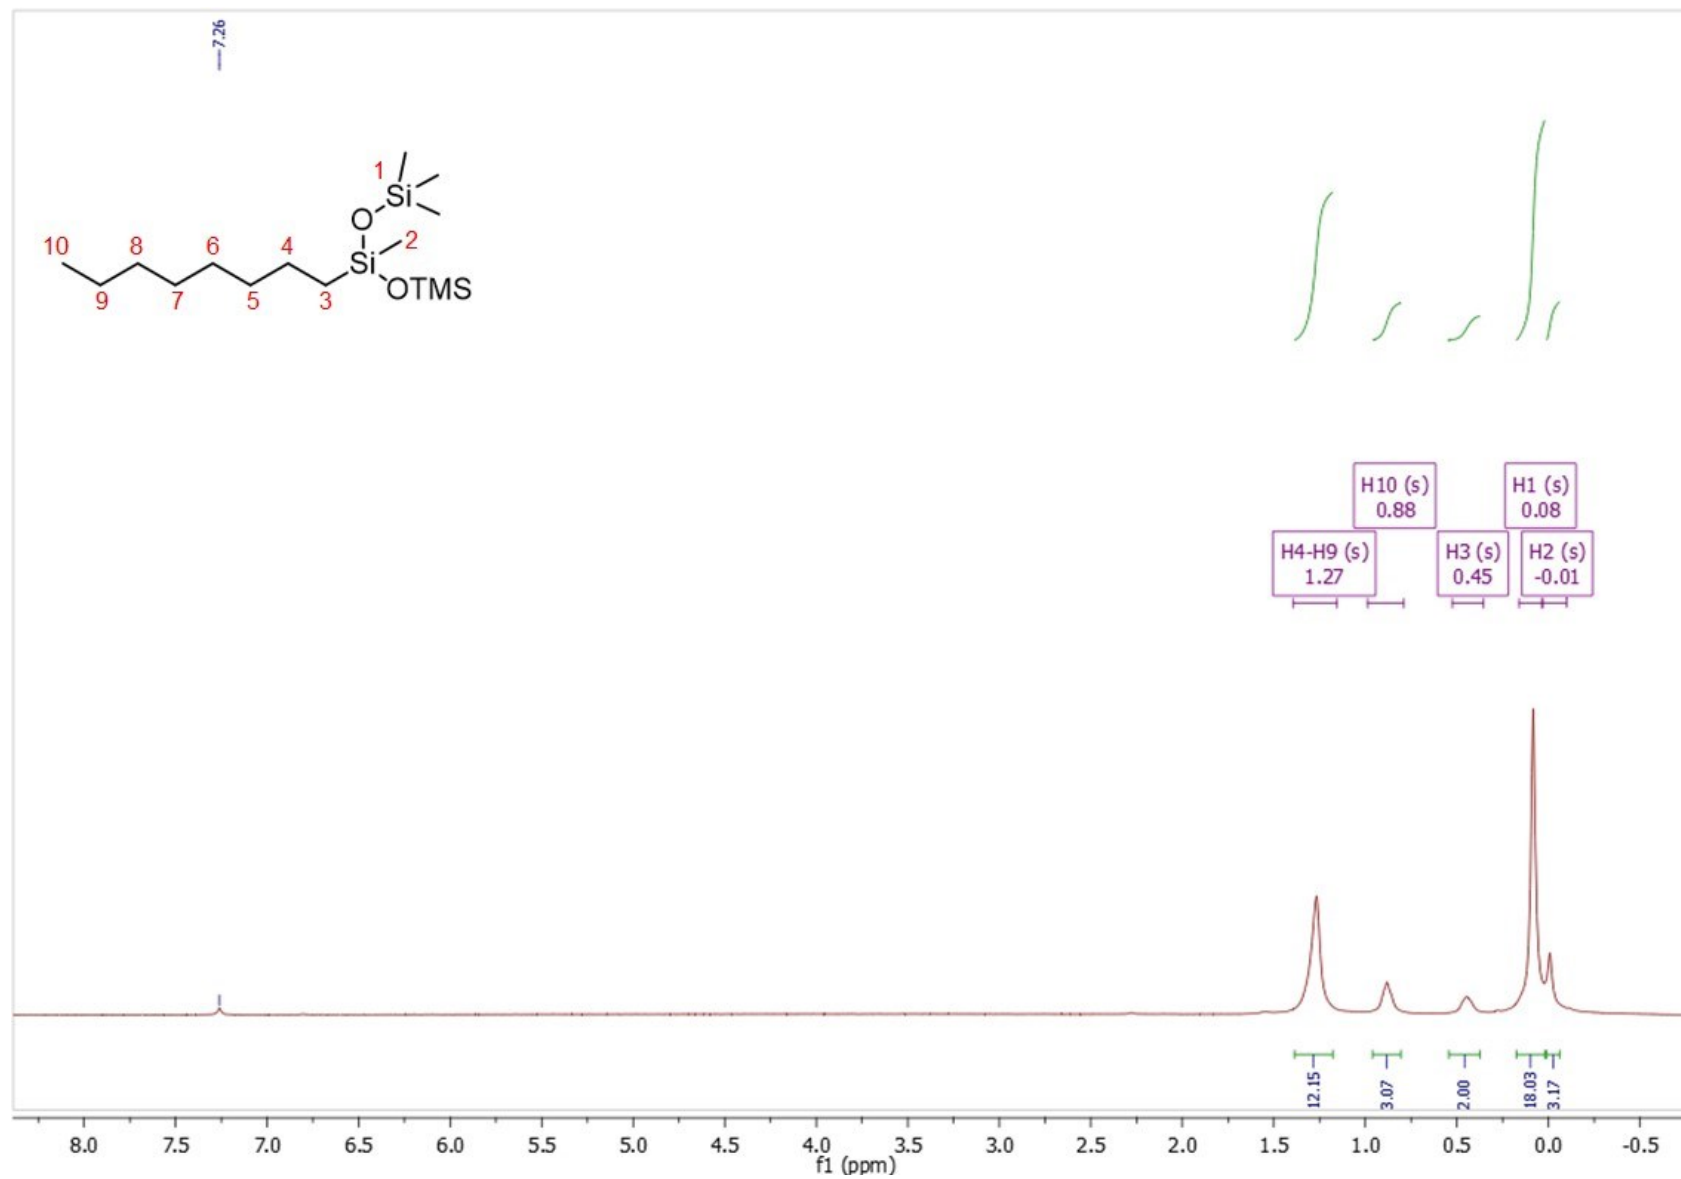



$^1\text{H}$  NMR spectrum (300 MHz,  $\text{CDCl}_3$ ) of functionalization of MD<sup>H</sup>M with 1-hexene

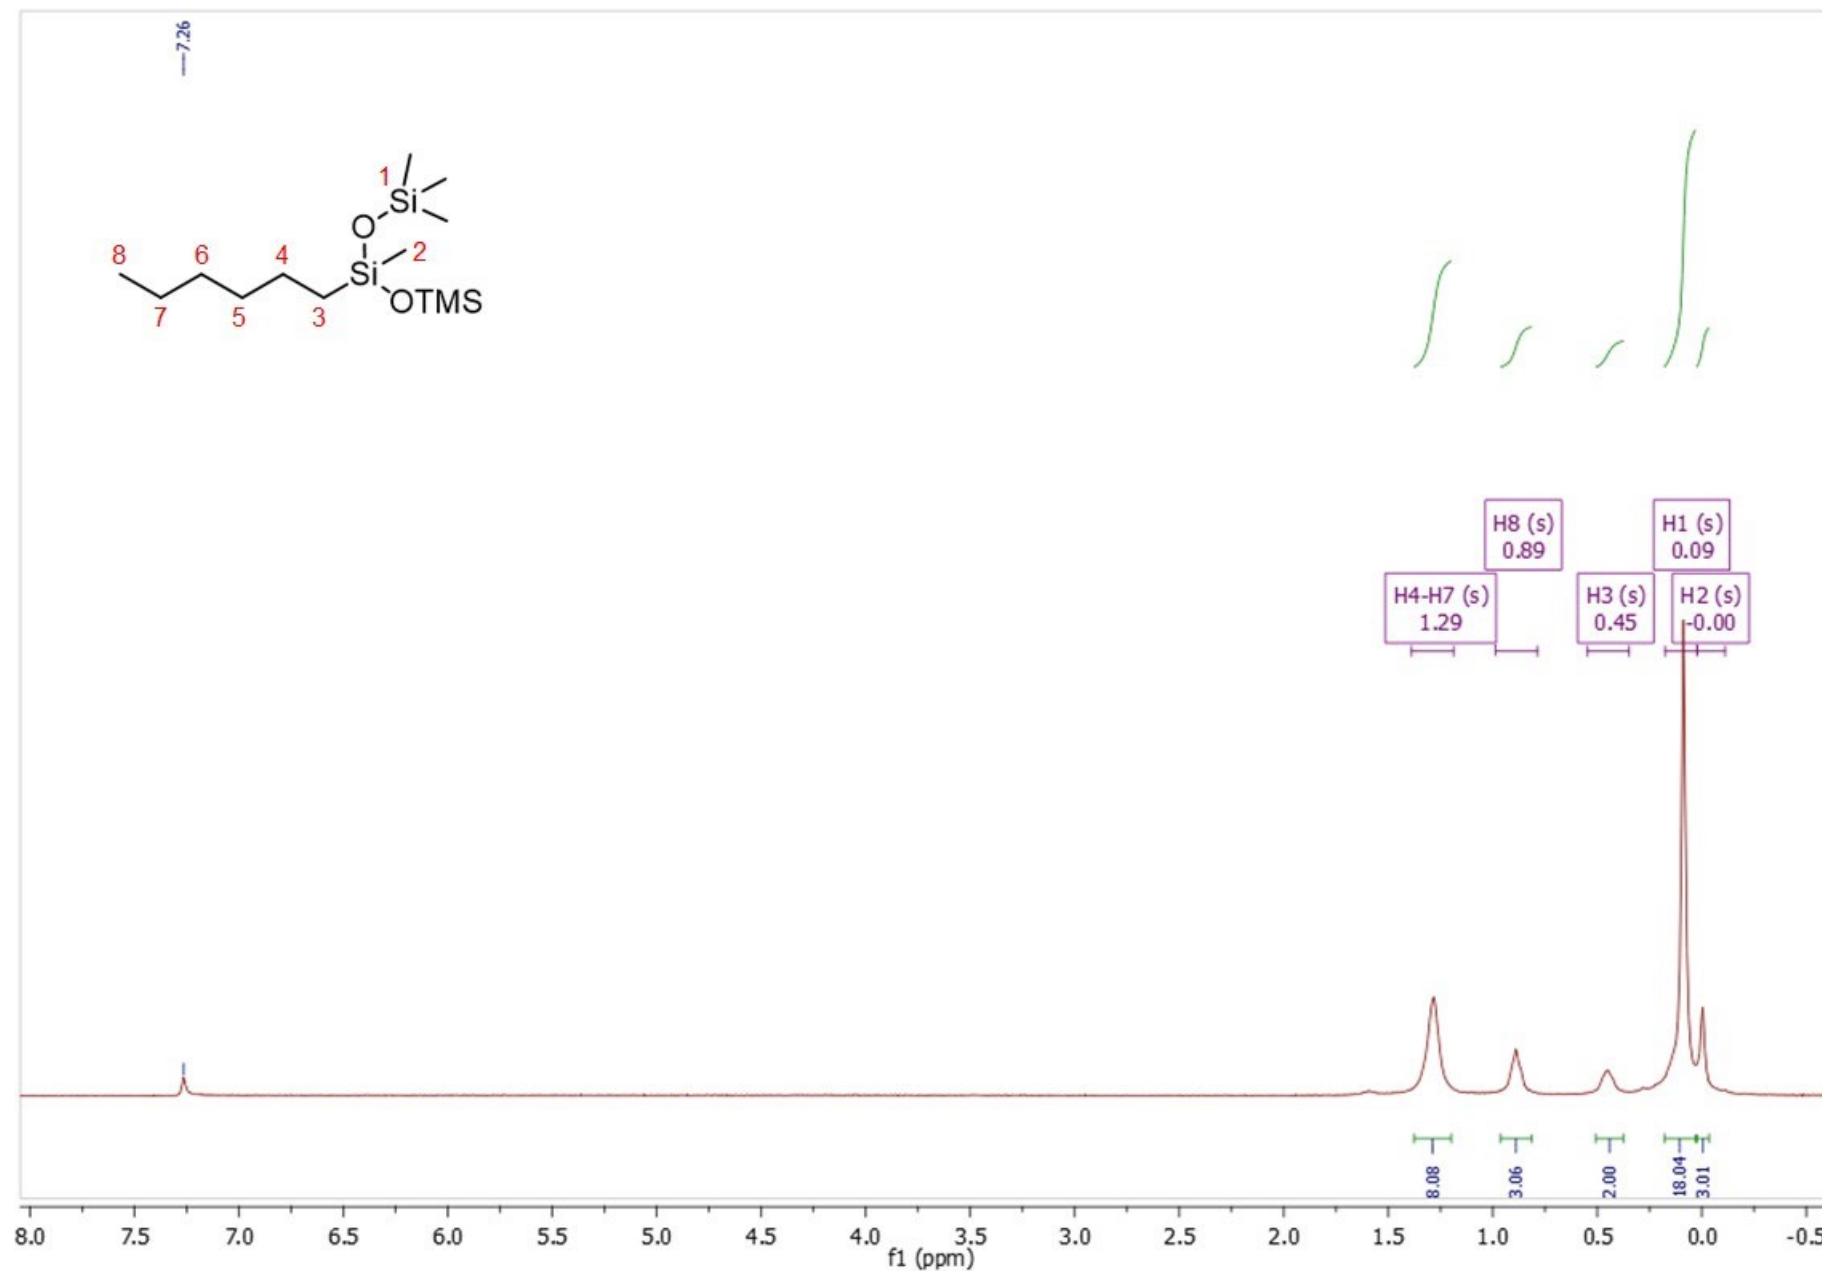

$^1\text{H}$  NMR spectrum (300 MHz,  $\text{CDCl}_3$ ) of functionalization of MD<sup>H</sup>M with styrene

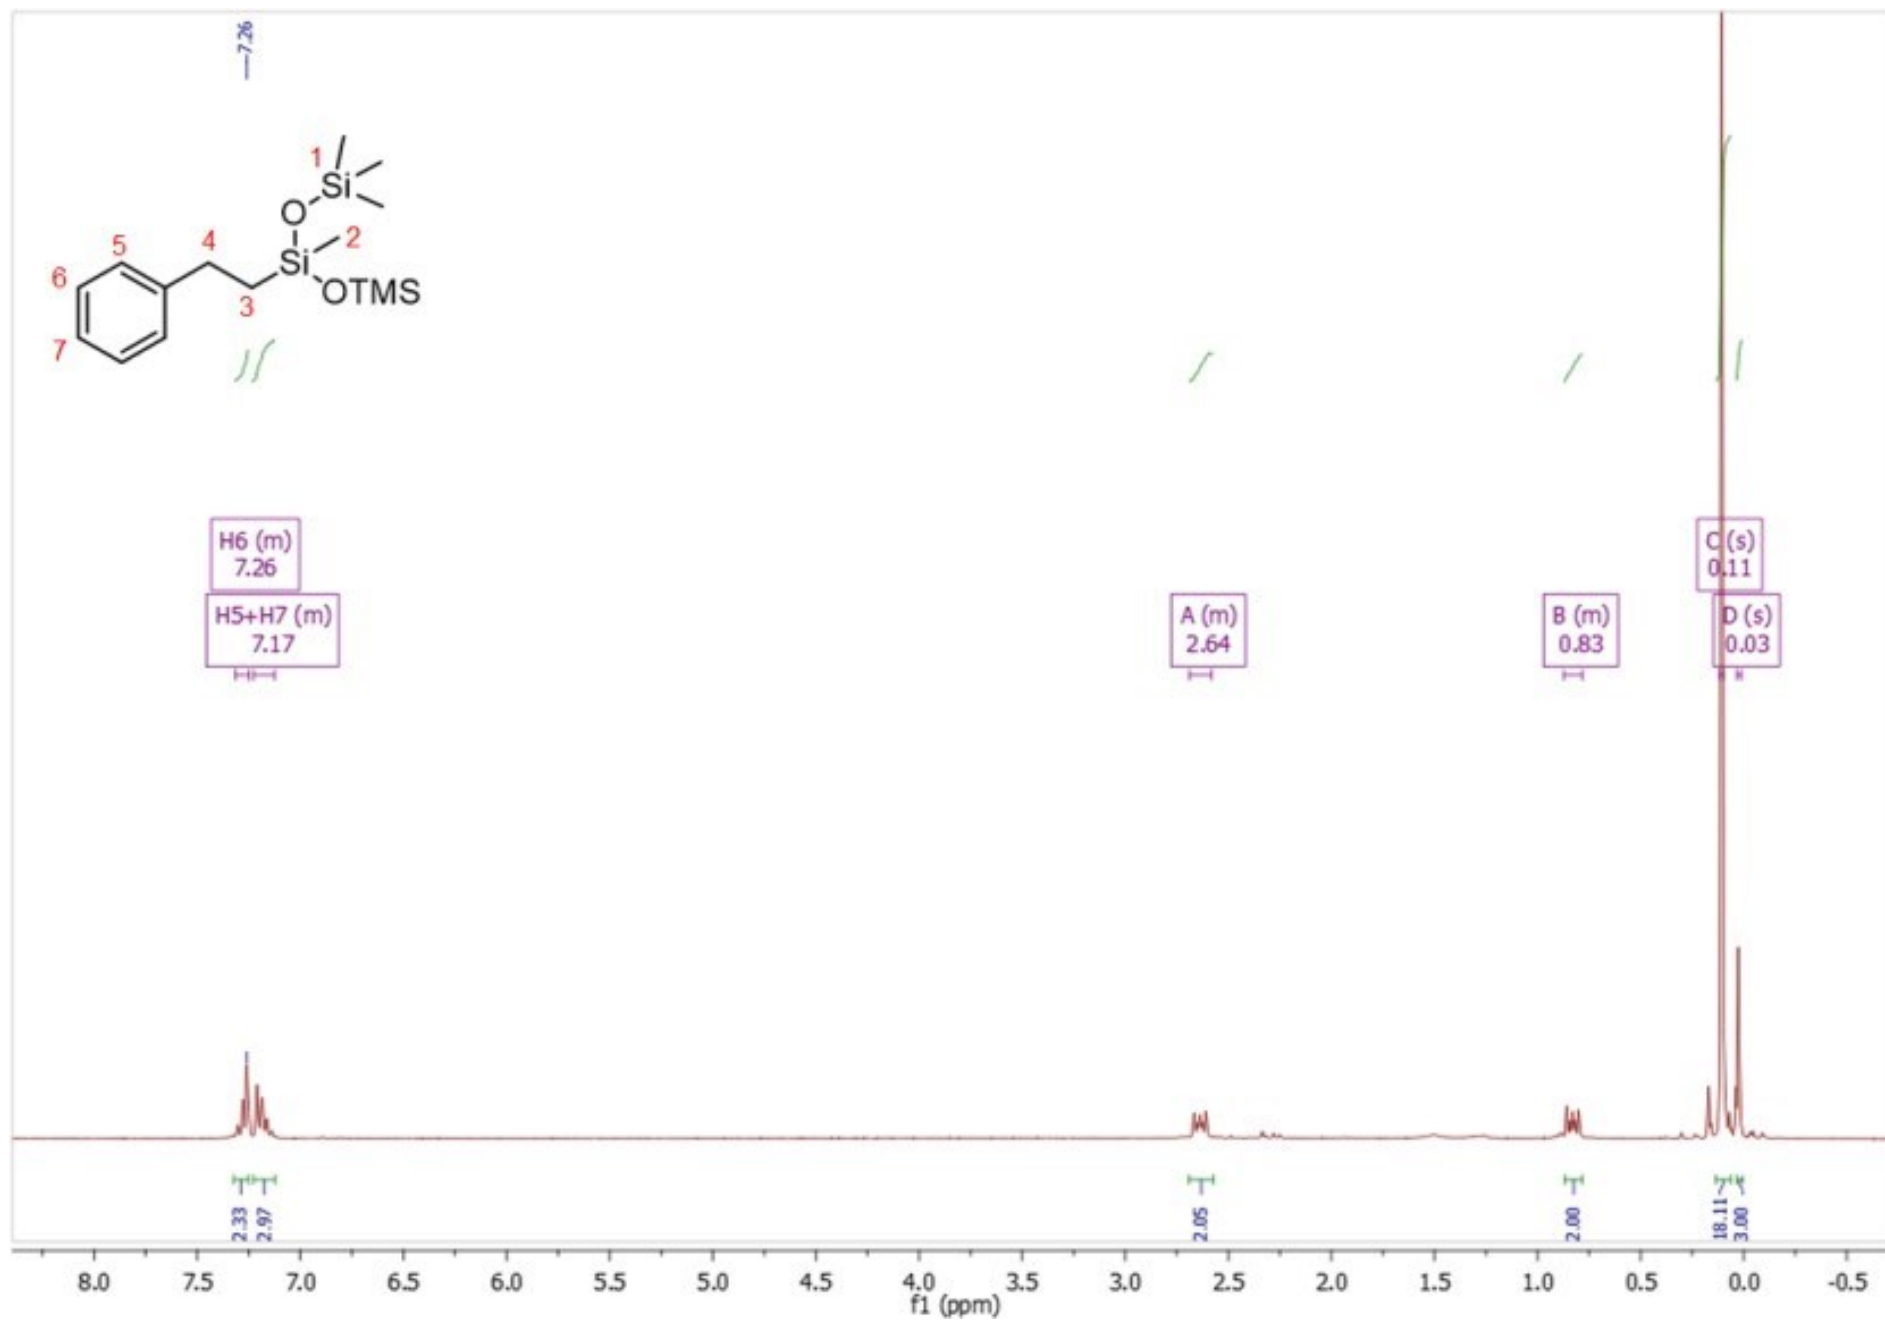

$^1\text{H}$  NMR spectrum (300 MHz,  $\text{CDCl}_3$ ) of functionalization of MD<sup>H</sup>M with allylbenzene

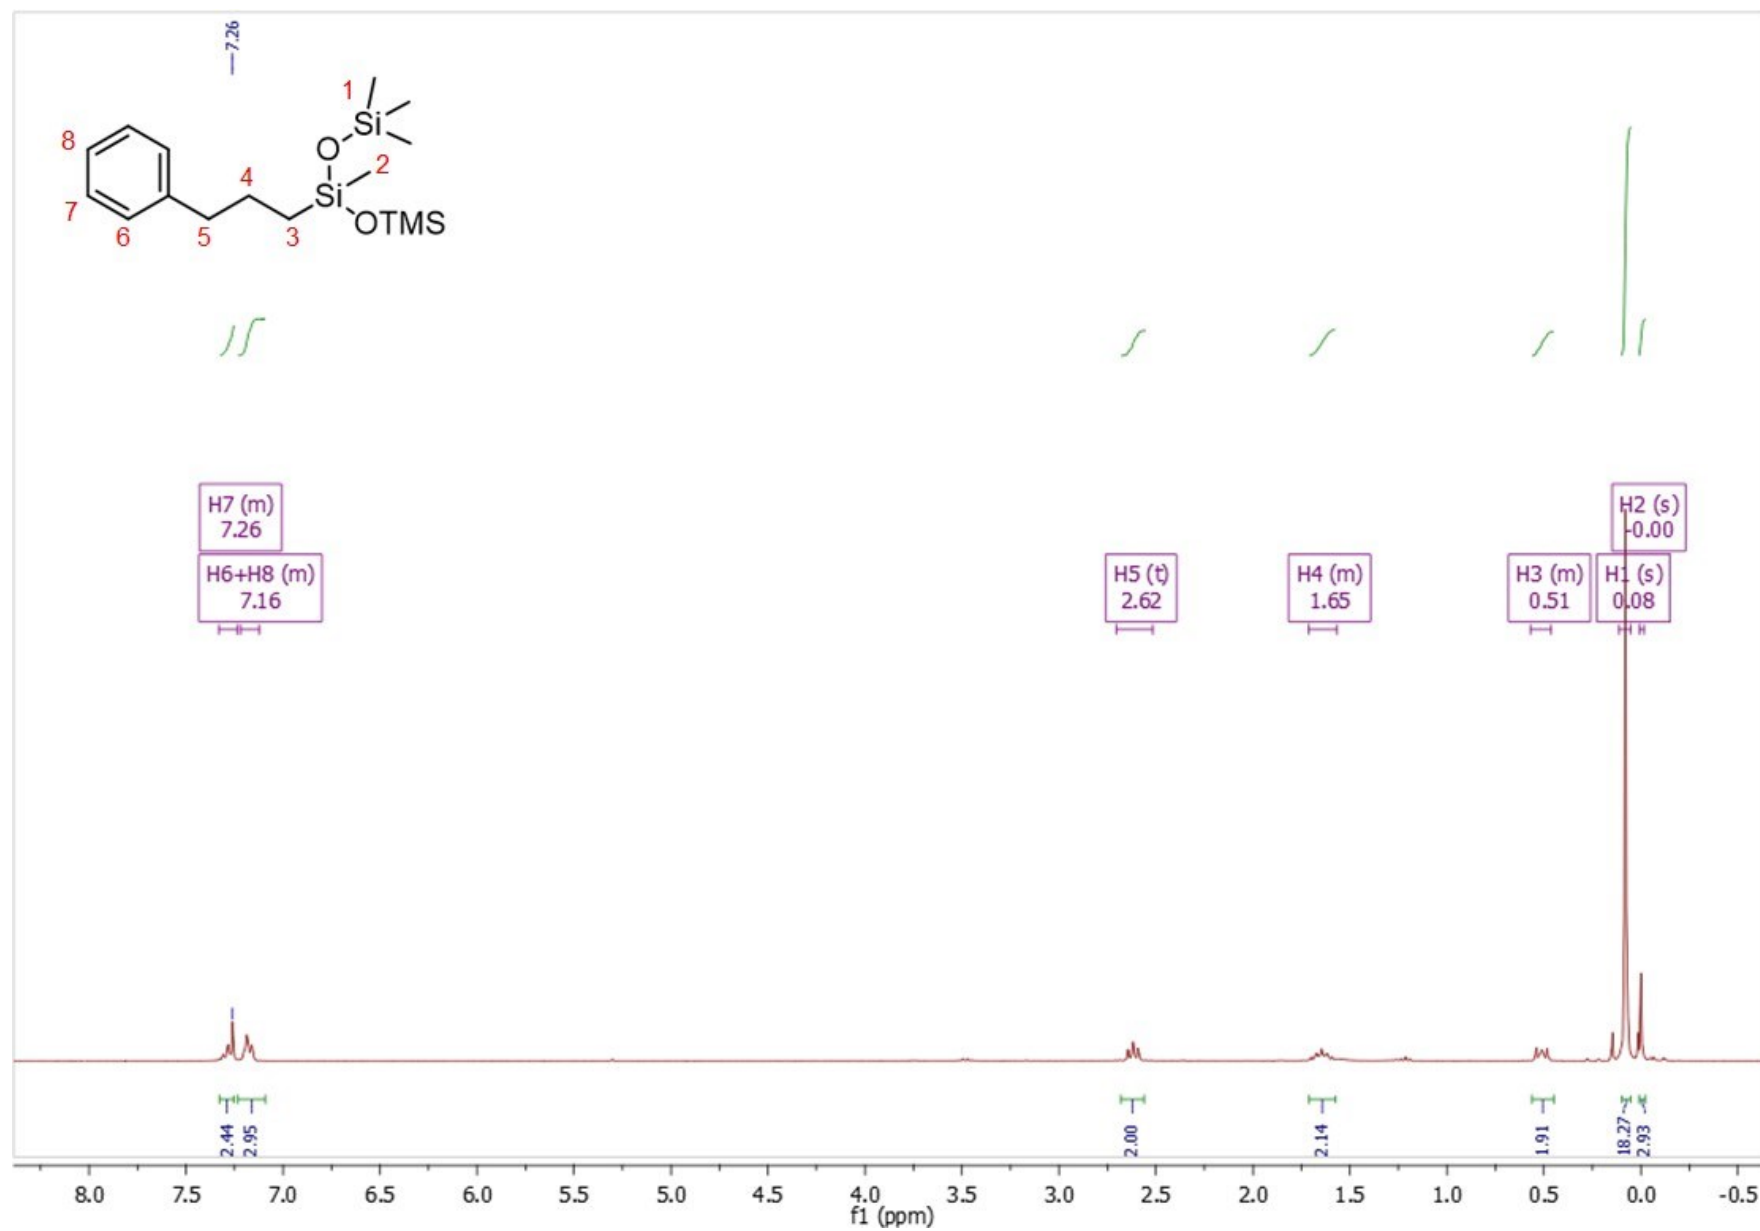

<sup>1</sup>H NMR spectrum (300 MHz, CDCl<sub>3</sub>) of functionalization of MD<sup>H</sup>M with 4-phenyl-1-butene

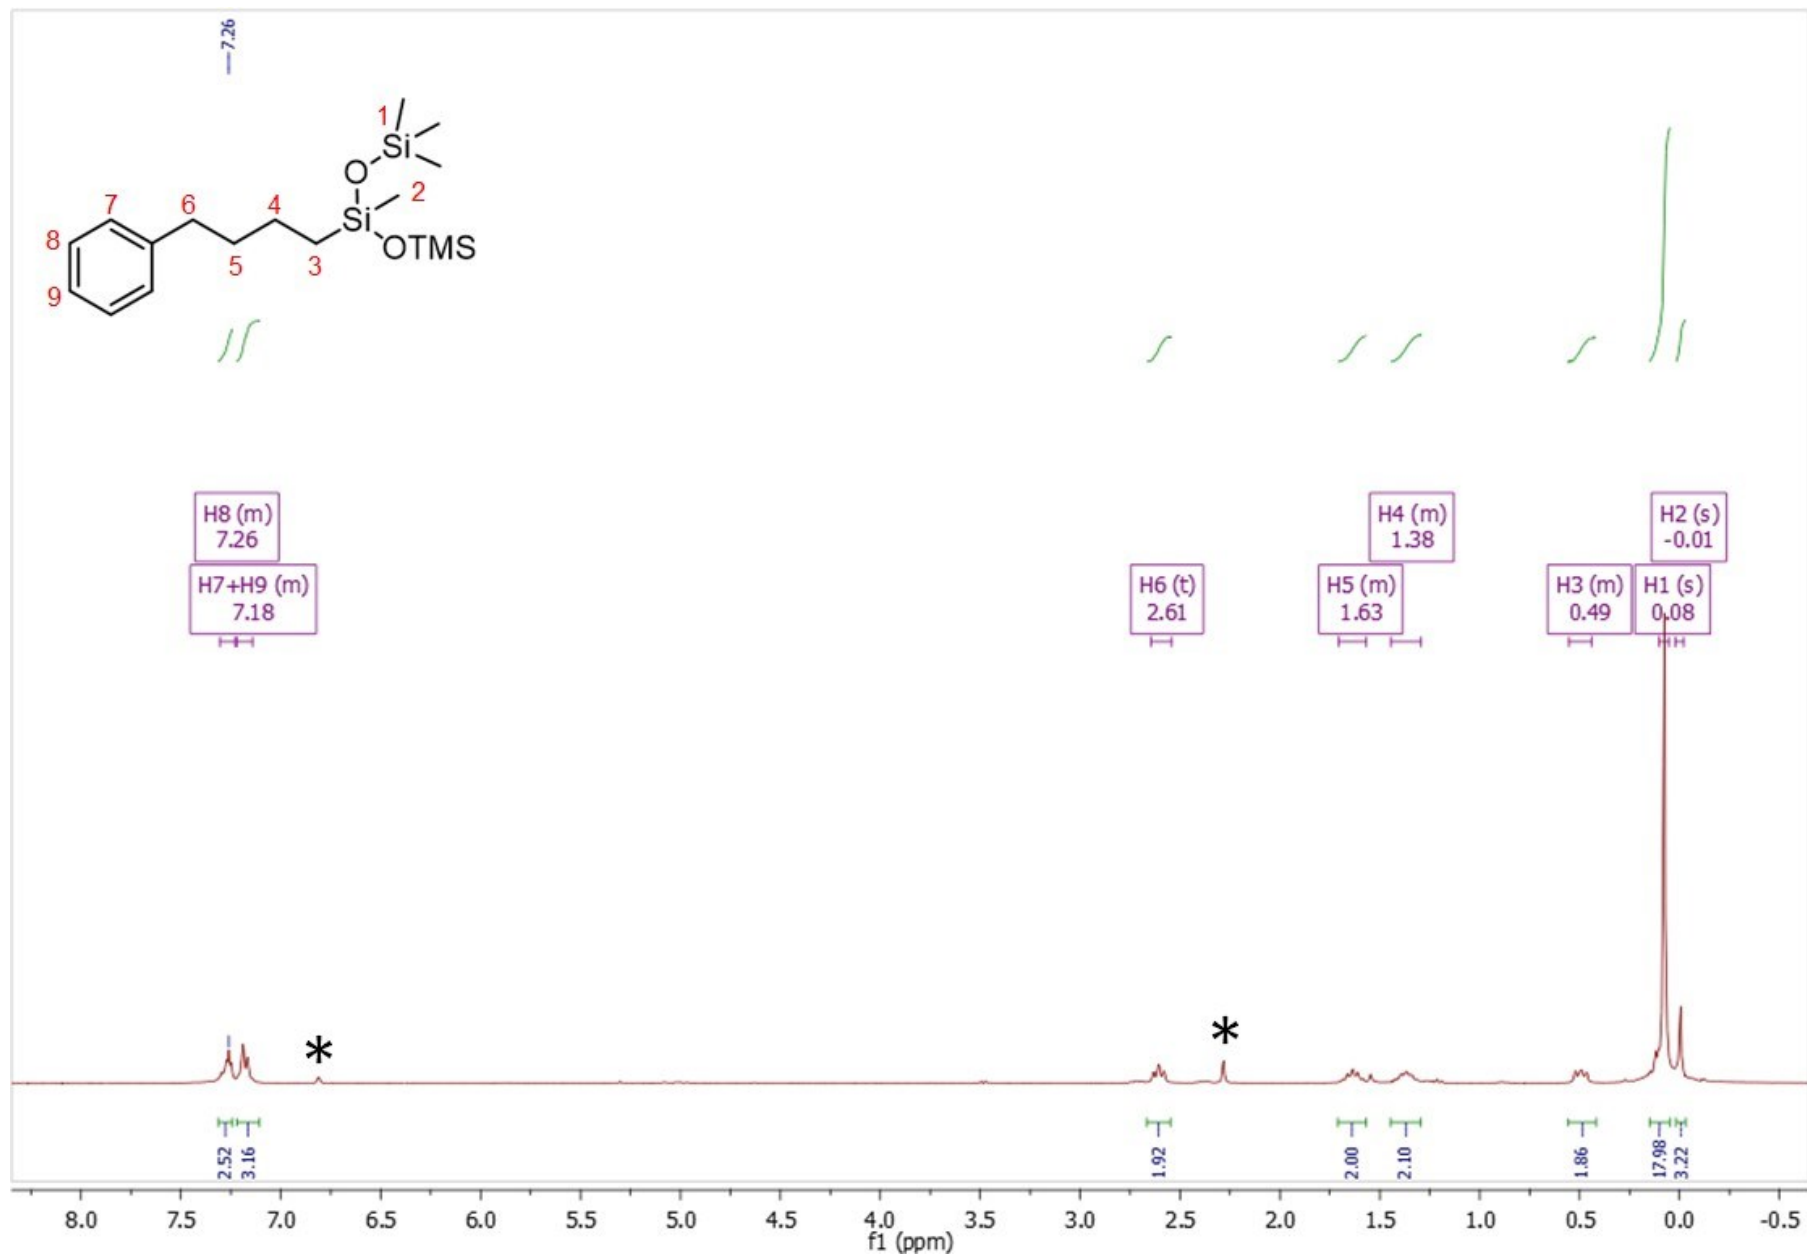

$^1\text{H}$  NMR spectrum (300 MHz,  $\text{CDCl}_3$ ) of functionalization of MD<sup>H</sup>M with allyl phenyl ether

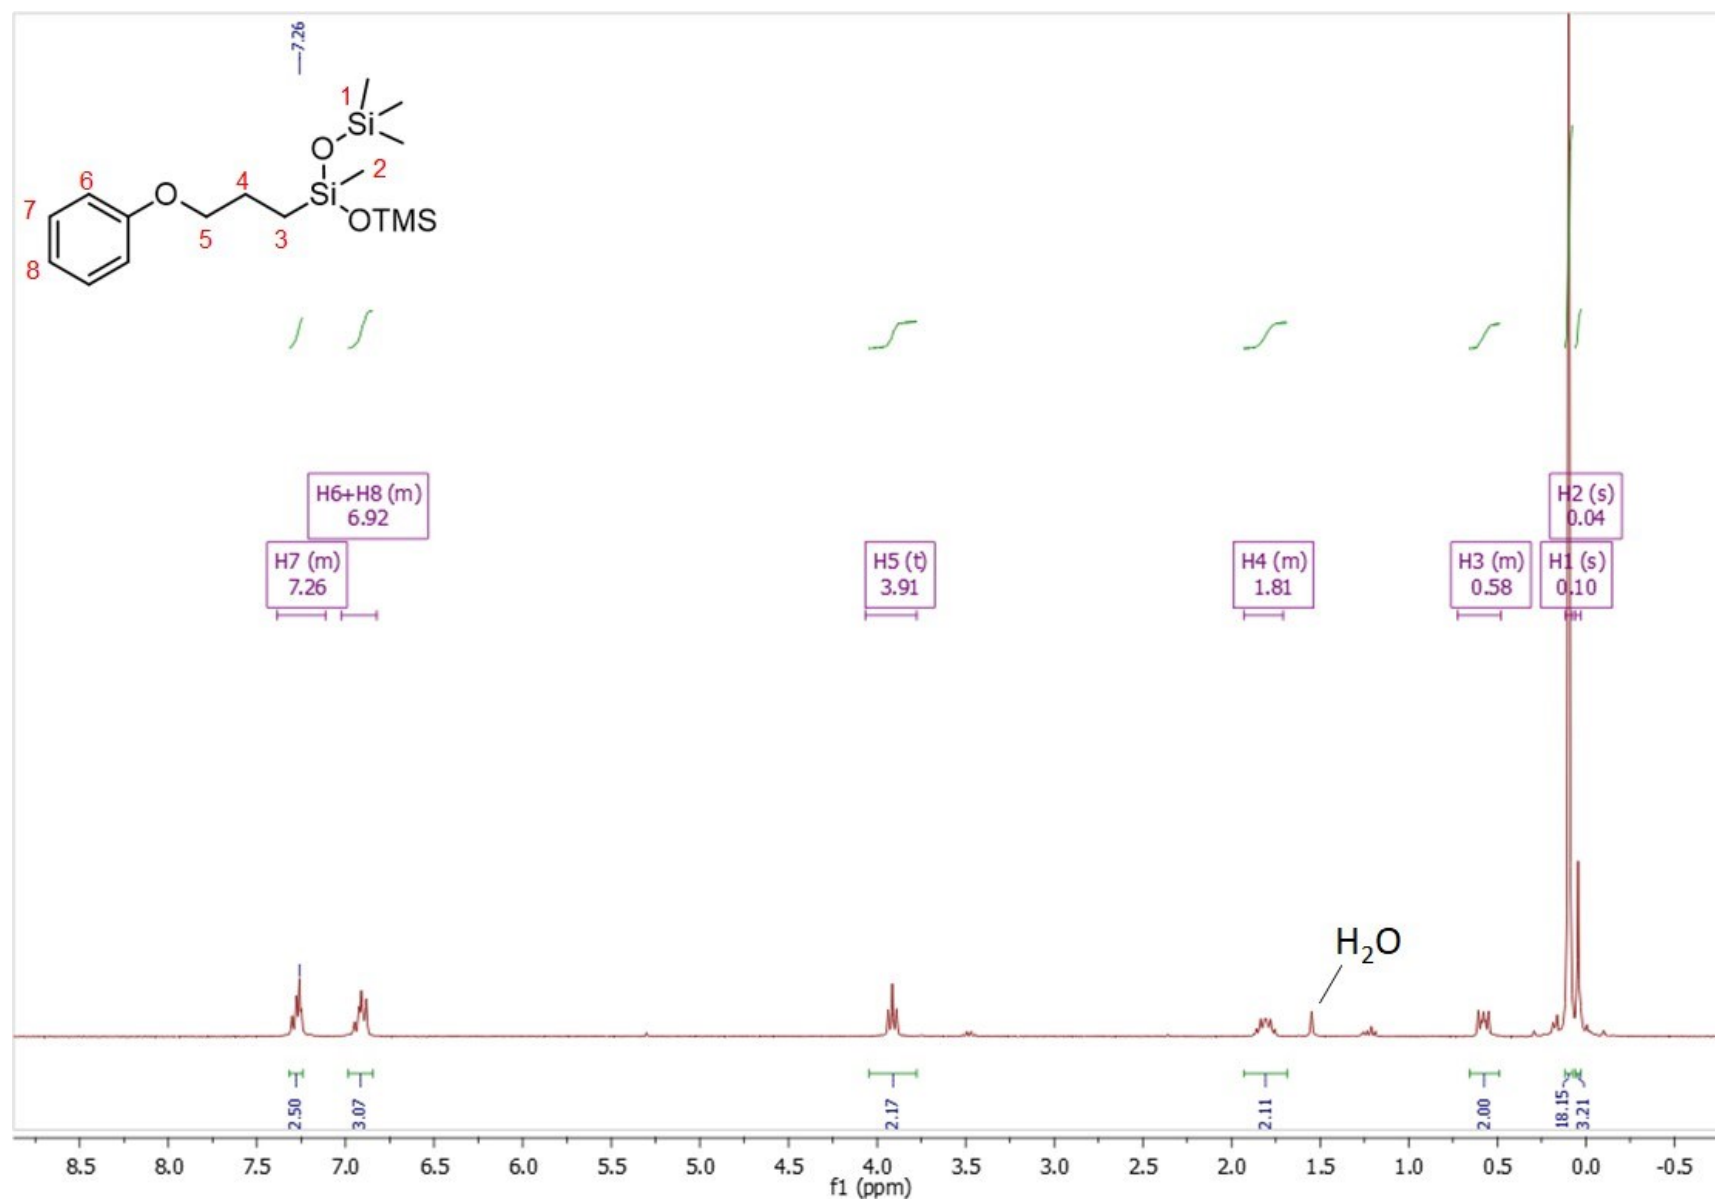

$^1\text{H}$  NMR spectrum (300 MHz,  $\text{CDCl}_3$ ) of functionalization of MD<sup>H</sup>M with allyl butyl ether

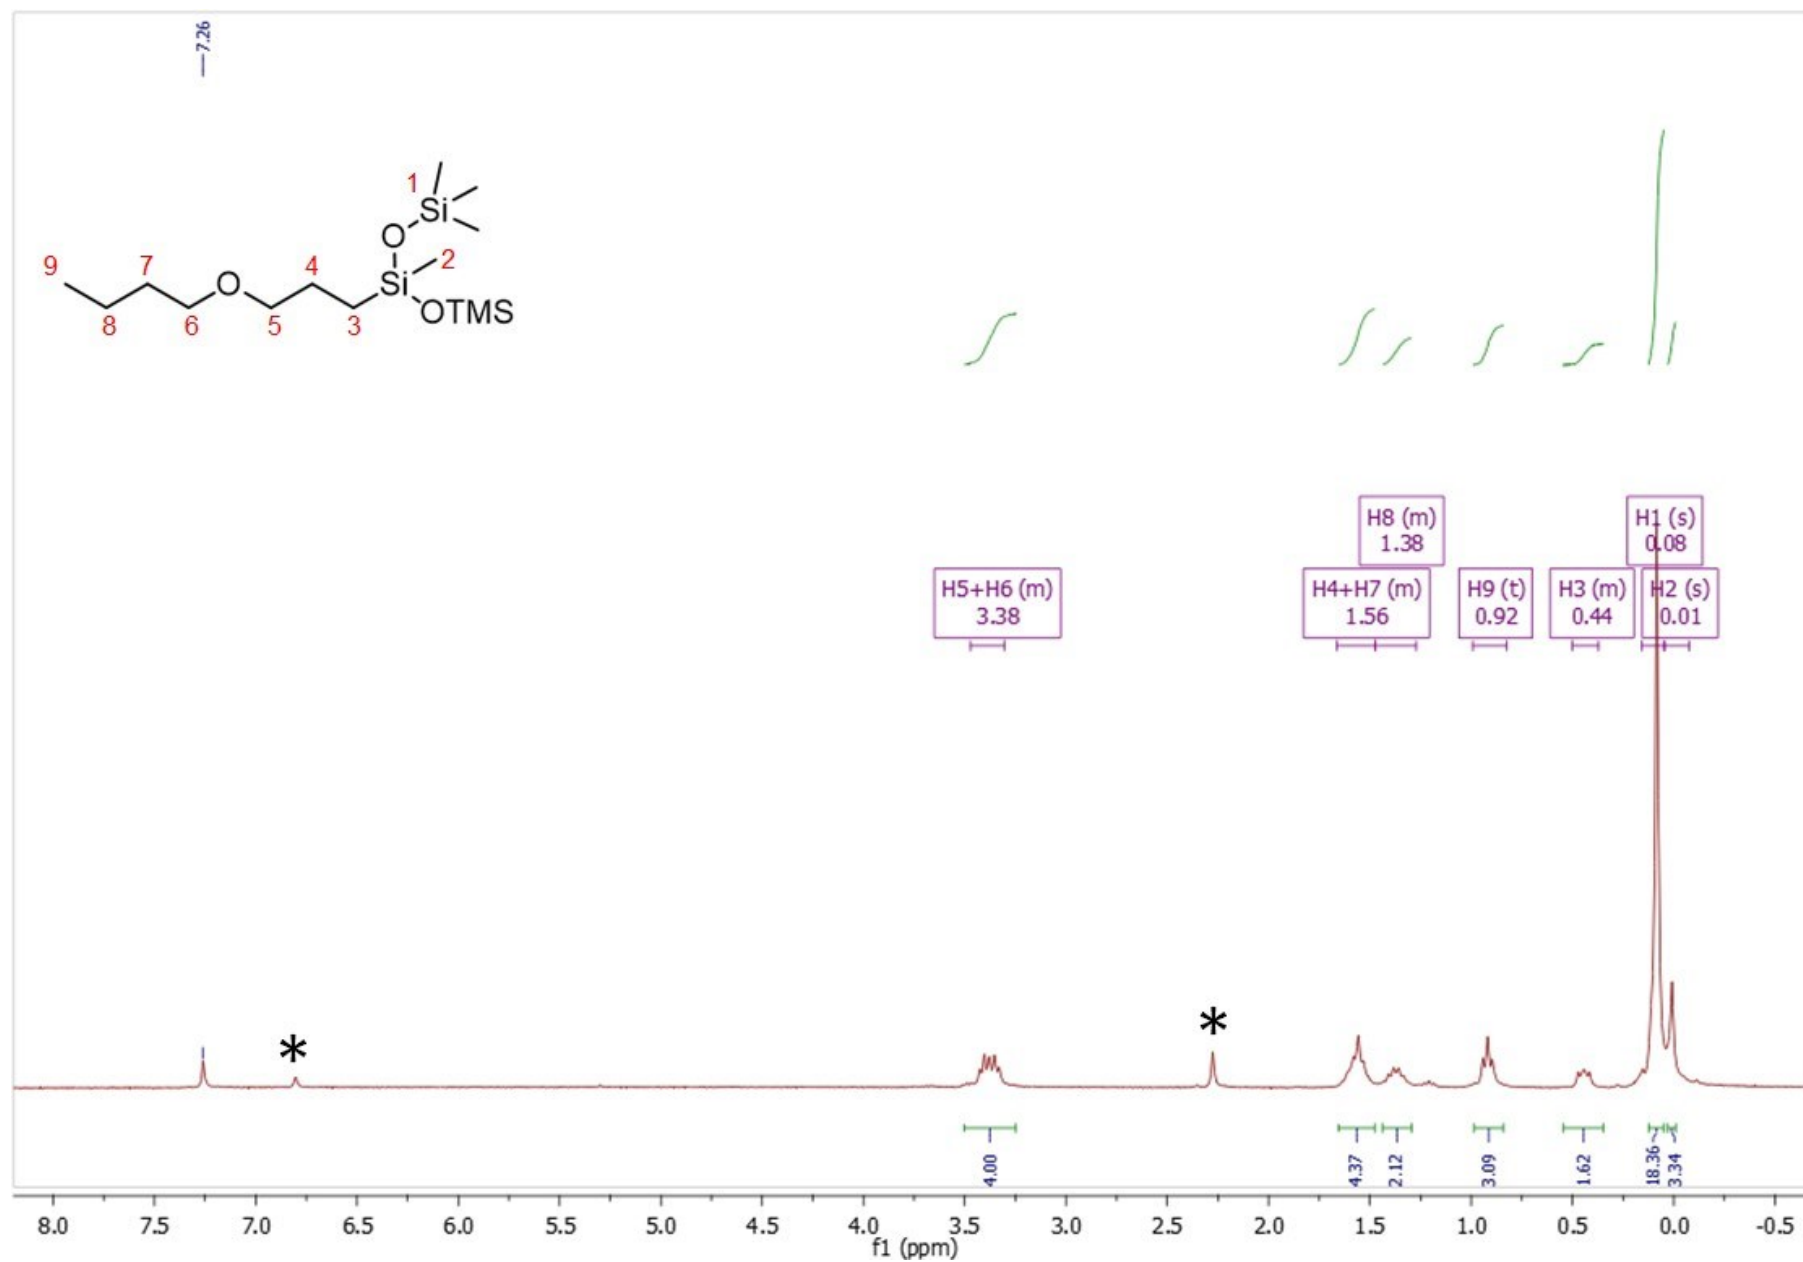

\*  
Mesitylene  
(GC  
Standard)

$^1\text{H}$  NMR spectrum (300 MHz,  $\text{CDCl}_3$ ) of functionalization of MD<sup>H</sup>M with allyloxytrimethylsilane

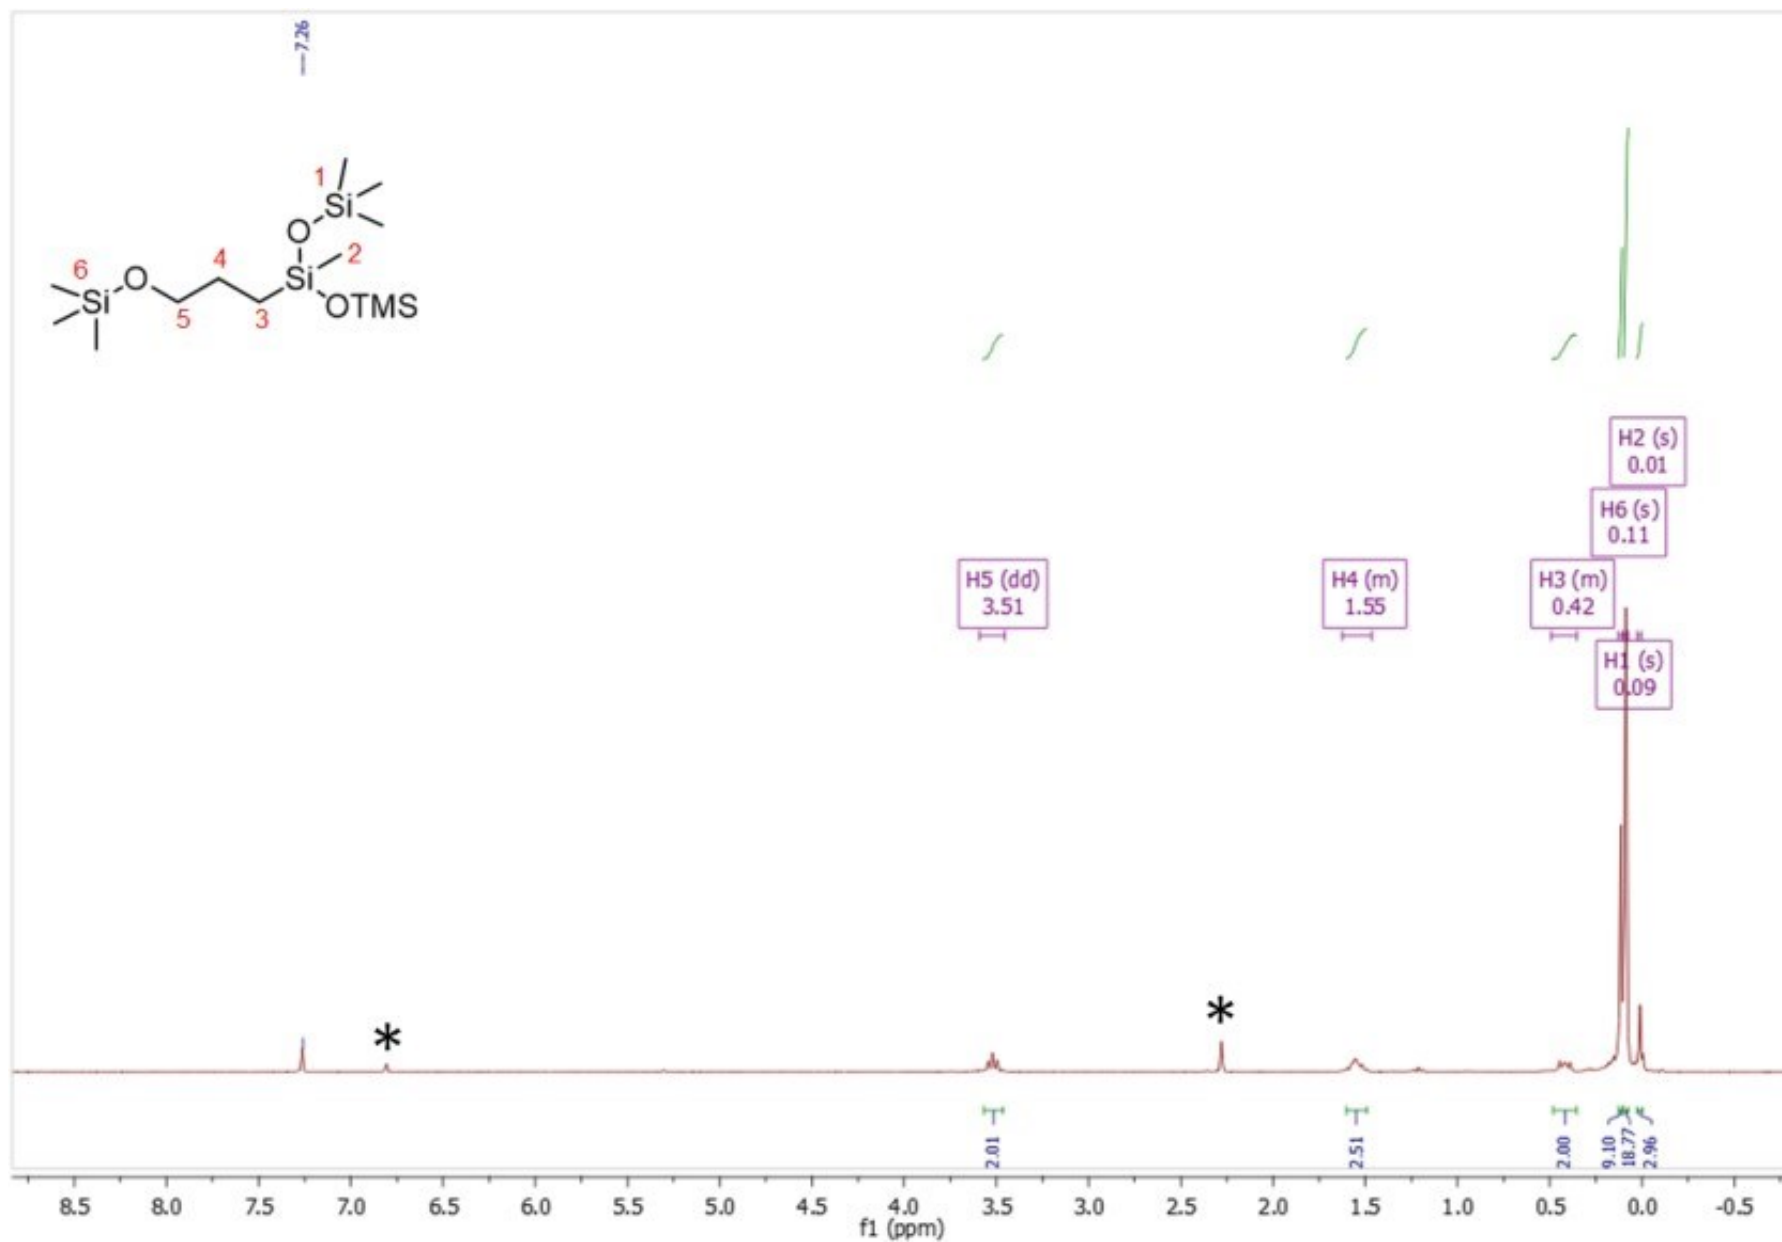

$^1\text{H}$  NMR spectrum (300 MHz,  $\text{CDCl}_3$ ) of functionalization of MD<sup>H</sup>M with allyl acetate

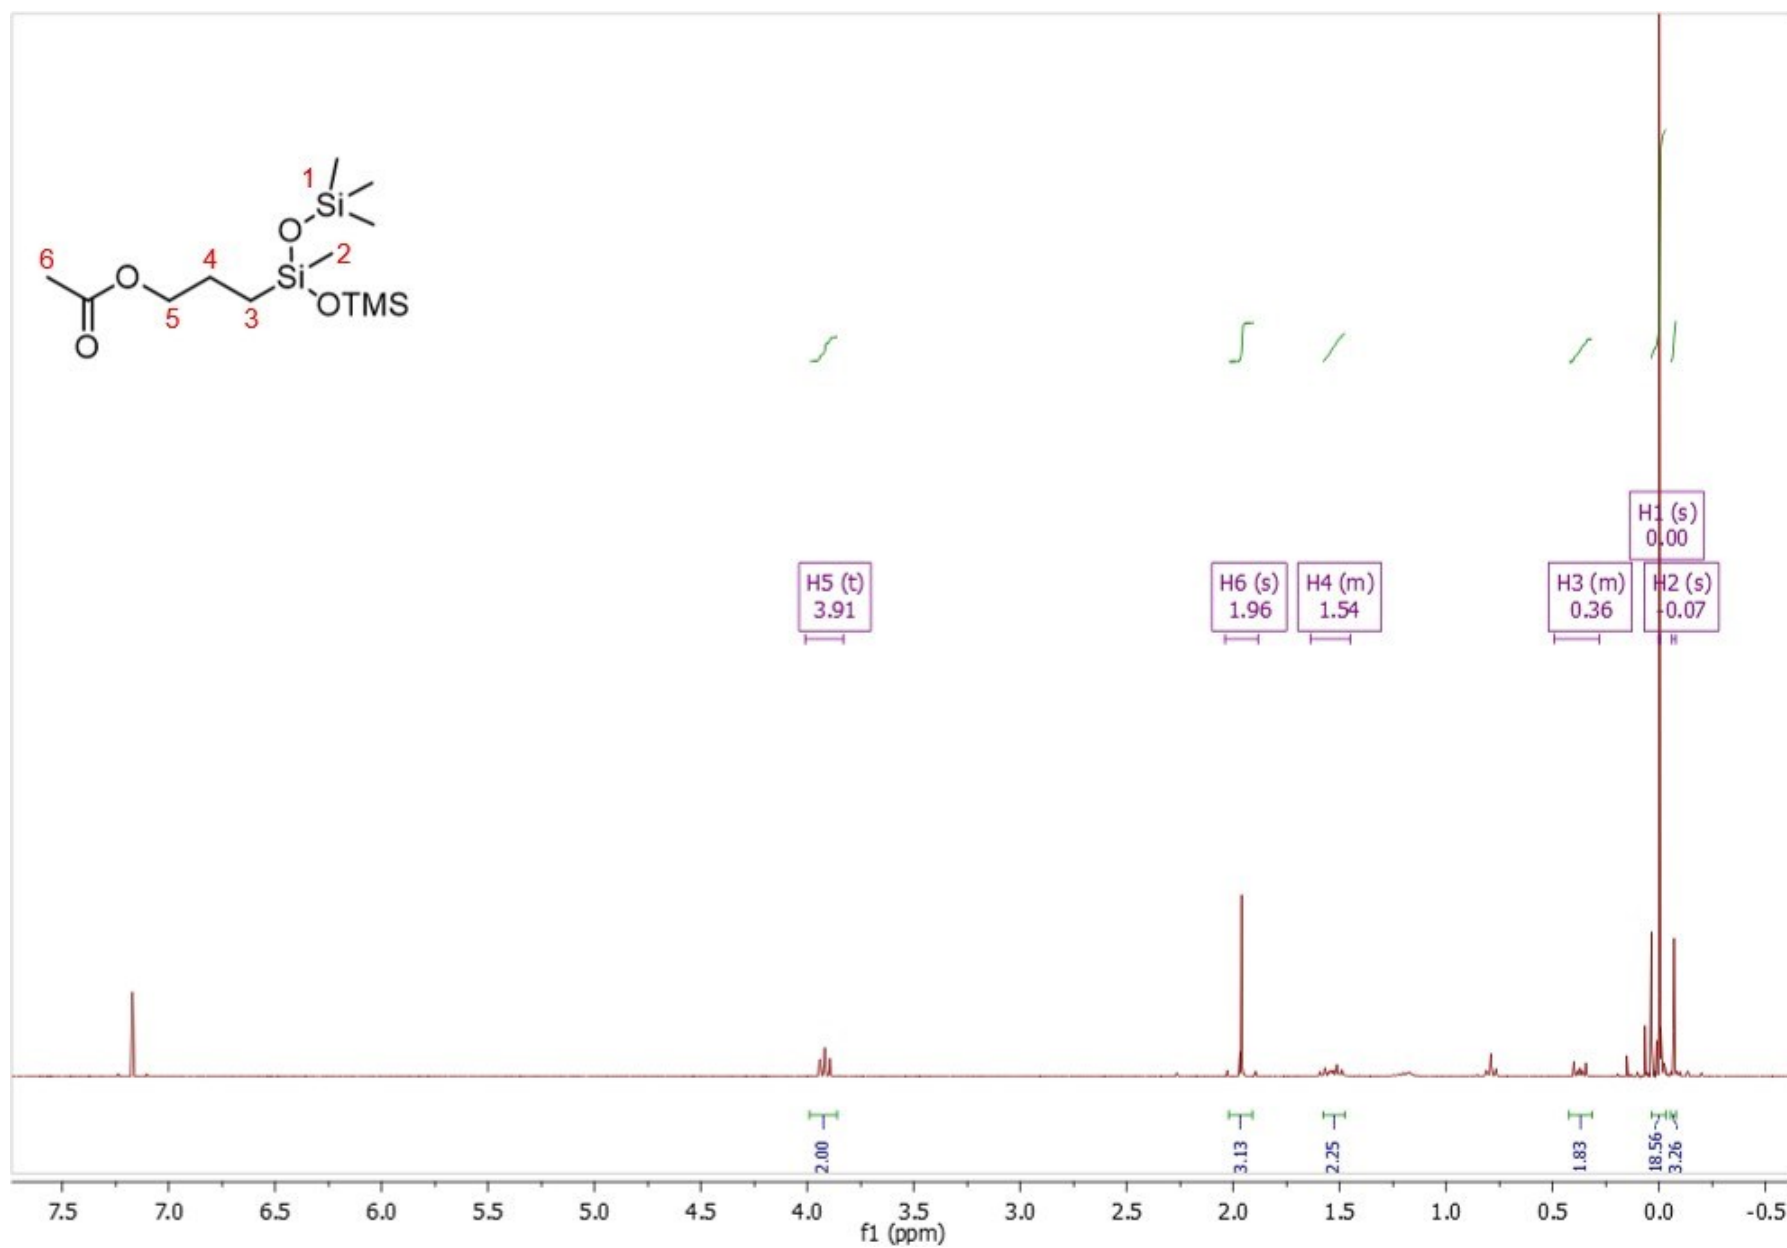



$^1\text{H}$  NMR spectrum (300 MHz,  $\text{CDCl}_3$ ) of functionalization of Tri(ethoxy)silane with 1-octene

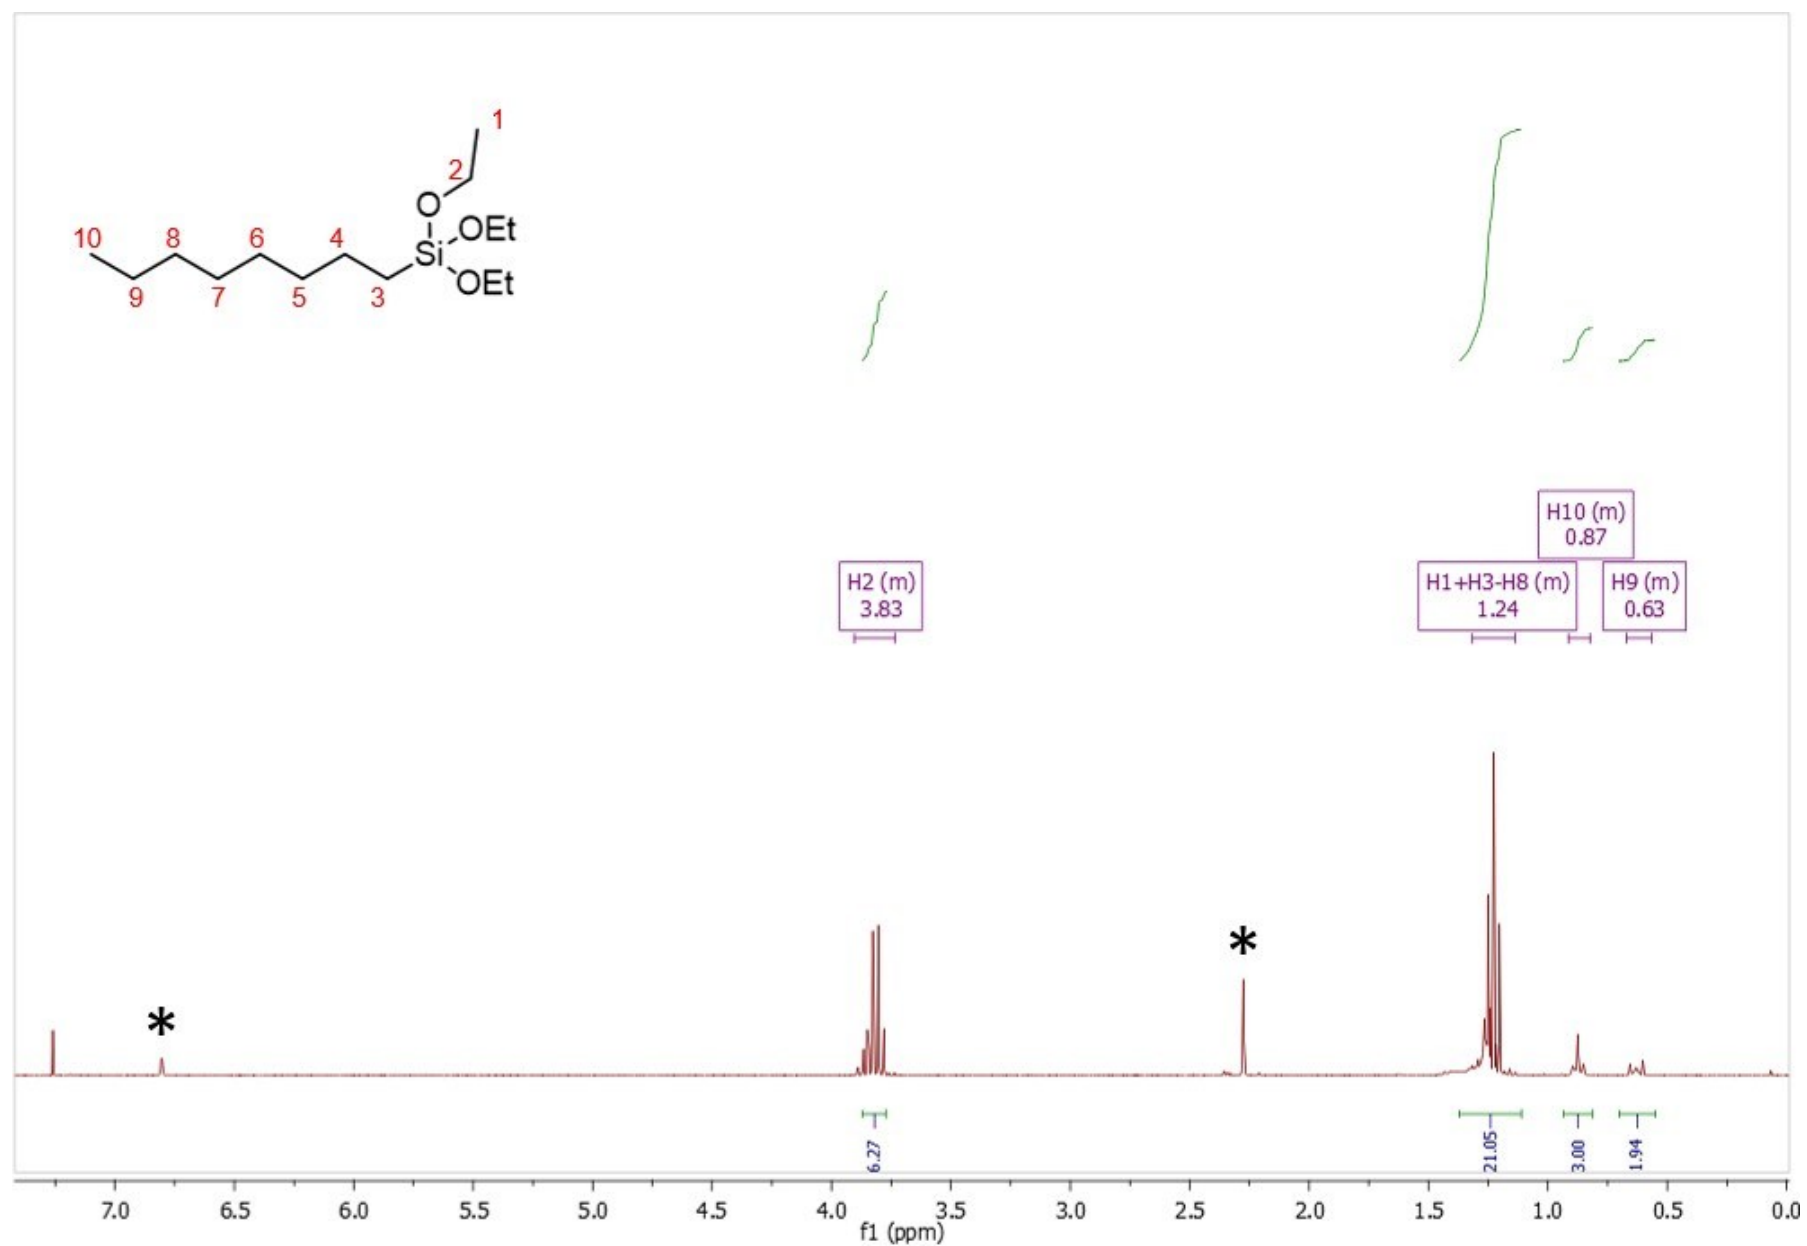

$^1\text{H}$  NMR spectrum (300 MHz,  $\text{CDCl}_3$ ) of functionalization of Triethylsilane with 1-octene

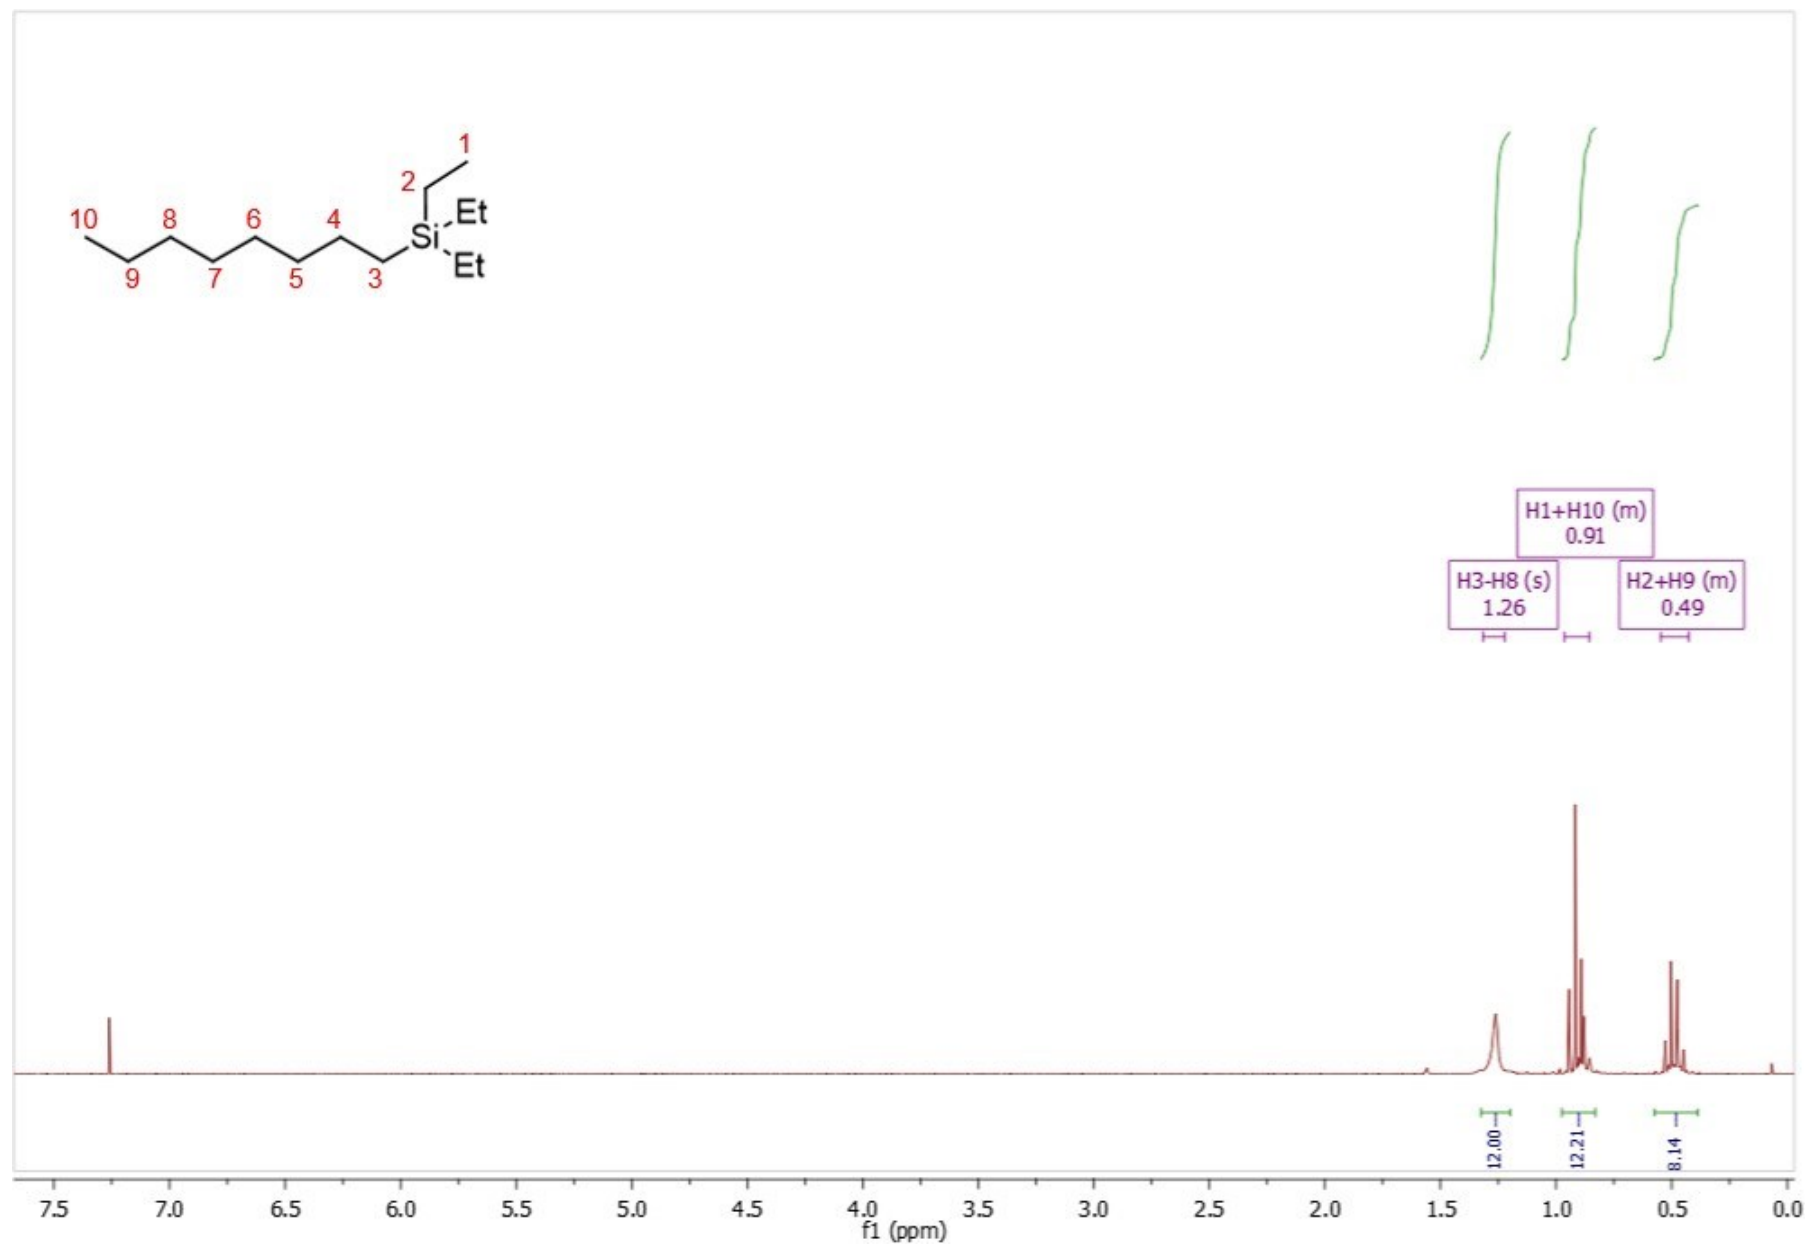

Supplement: d2cc00377e1.pdf [file d2cc00377e1.pdf]
